# Supplementary material
Source: PubMed Central journal article supplement (PMC5880719)

## Supplemental Figure 1: Study Team Disciplines & Country

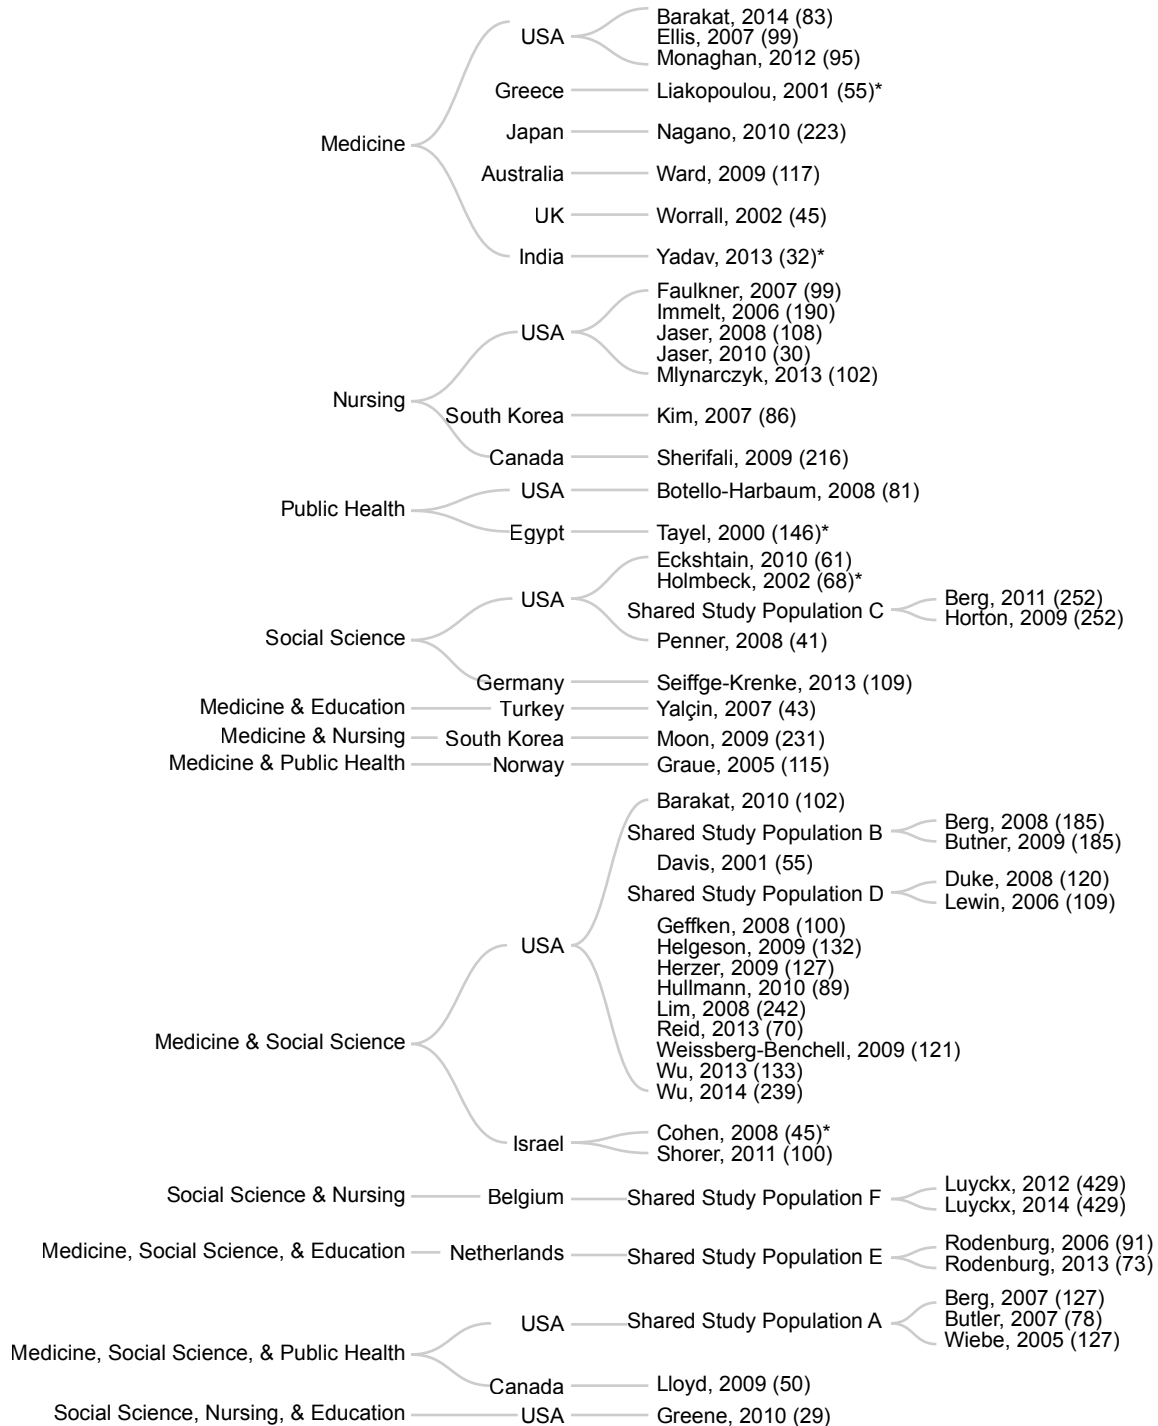

Supplement: NIHMS904561-supplement-2.pdf [file NIHMS904561-supplement-2.pdf]

## Supplemental Figure 2: Parenting Dimensions & Child Variable Relationships by Study

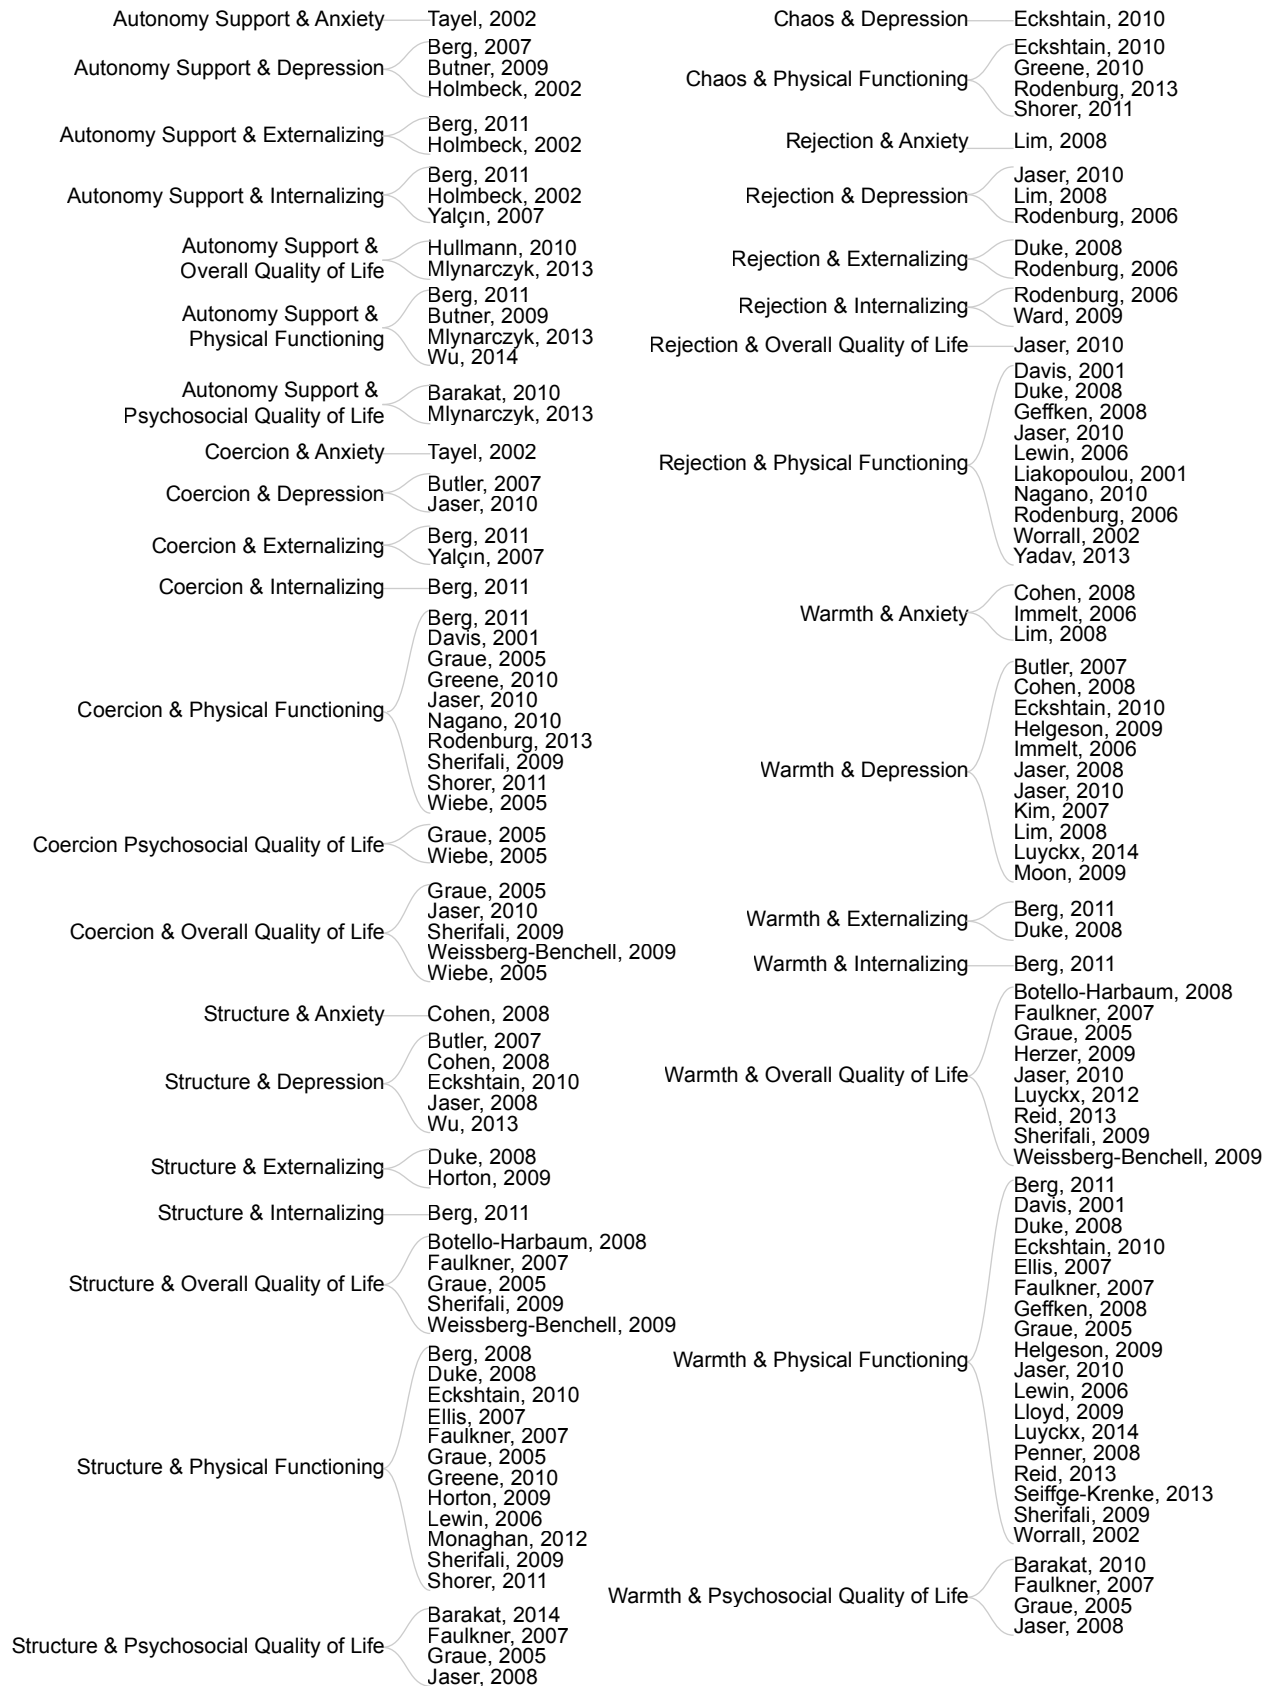

Supplement: NIHMS904561-supplement-3.pdf [file NIHMS904561-supplement-3.pdf]
